# Supplementary material
Source: PubMed Central journal article supplement (PMC5543334)

## Supplementary Online Content

Popenko NA, Tripathi PB, Devcic Z, Karimi K, Osann K, Wong BJJ. A quantitative approach to determining the ideal female lip aesthetic and its effect on facial attractiveness. *JAMA Facial Plast Surg*. Published online February 16, 2017. doi:10.1001/jamafacial.2016.2049

**eFigure.** Additive or Ordinal Attractiveness Scores

This supplementary material has been provided by the authors to give readers additional information about their work.

**eFigure.** Additive or Ordinal Attractiveness Scores

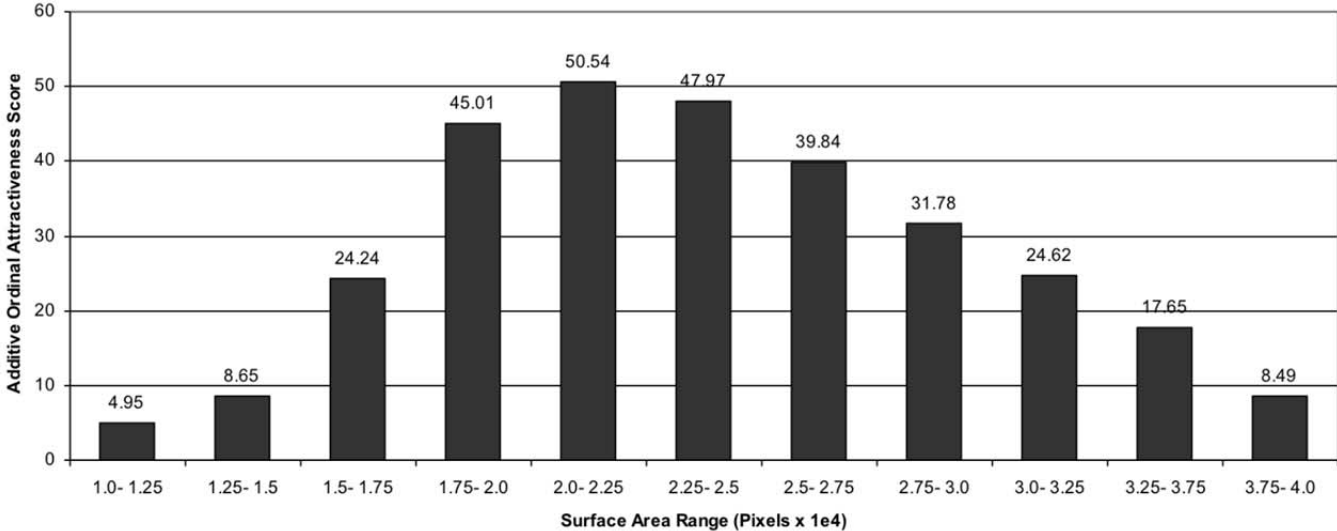

Supplement: jamafacialplastsurg-19-261-s001.pdf [file jamafacialplastsurg-19-261-s001.pdf]
